# Supplementary material for: Long-Term Follow-Up of Newborns with 22q11 Deletion Syndrome and Low TRECs
Source: PubMed Central journal article supplement (PMC9016018; doi:10.1007/s10875-021-01201-5), 2022-01-26
Supplement: 10875_2021_1201_MOESM1_ESM.pdf [file 10875_2021_1201_MOESM1_ESM.pdf]

## Supplementary material

*Long-term follow-up of newborns with 22q11 deletion syndrome and low TRECs*

Journal of Clinical Immunology

Corresponding author:

Jenny Lingman Framme, MD

The Department of Pediatrics, The Sahlgrenska Academy at University of Gothenburg, Gothenburg, Sweden

Jenny.lingman-framme@gu.se

## Supplementary Methods

### *Study population*

*Inclusion criteria.* All patients had 22q11DS confirmed by fluorescence *in situ* hybridization (FISH), multiplex ligation-dependent probe amplification (MLPA) or CGH array. Healthy controls were either related to hospital staff or persons claiming good health who were admitted for minor surgery. *Exclusion criteria* were premature birth (<35 weeks gestational age), thymectomy or symptoms of ongoing infection. Premature birth was used as an exclusion criteria because it is known to affect neonatal TREC numbers [20].

### *Clinical assessment*

A retrospective review of national health records was performed for all patients with 22q11DS and the diagnoses were recorded. All participants filled out a health questionnaire regarding their general health, vaccination status, previous infections, allergies and autoimmune disease.

### *Assessment of infection severity*

Significant viral infections were defined as viral infections that required hospital admission. Viral infections that repeatedly lasted more than 2 weeks were regarded as prolonged. Significant bacterial infections were defined as soft tissue infections or pneumonia (with radiologically proven infiltrates and CRP >50) that occurred more than once or a single episode of septicemia, meningitis or osteomyelitis. Recurrent otitis media was defined as a diagnosis of acute otitis media that required antibiotic treatment more than 5 times per year at any time-point during the follow-up period. Any infection with *Candida* was recorded as a significant infection.

### *TREC analysis at follow-up*

DNA was extracted from fresh, whole blood using the QIAamp Blood Mini Kit (Qiagen, Venlo, The Netherlands), followed by a triplex Real-Time qPCR for TRECs and the endogenous reference gene glyceraldehyde-3-phosphate dehydrogenase (*GAPDH*) [21], performed in the same plate in the LightCycler 480

II instrument (Roche, Basel, Switzerland). The PCR was conducted in a volume of 20  $\mu\text{L}$ , containing 10  $\mu\text{L}$  of LightCycler 480 SYBR Green I Master (Roche), 3  $\mu\text{L}$  of sample DNA at a concentration of 30 ng/ $\mu\text{L}$ , 1.4  $\mu\text{L}$  each of the forward and reverse primers, and 4.2  $\mu\text{L}$  dH<sub>2</sub>O. The signal joint TREC primer sequences were: forward, 5'-CATCCCTTTCAACCATGCTGACACCTCT-3' and reverse, 5'-CGTGAGAACGGTGAATGAAGAGCAGACA-3'. The *GAPDH* primer sequences were: forward, 5'-CAGCCCCTTCATACCCTCA-3' and reverse, 5'-GGACCATATTGAGGGACACA-3' (Thermo Fisher Scientific, Waltham, MA). Every PCR run included pCR2.1-human TREC and pCR2.1-*GAPDH* gene plasmids (Eurofins, Brussels, Belgium) of known concentrations as standards, as well as human cord blood DNA (30 ng/ $\mu\text{L}$ , rich in TRECs) as positive control and dH<sub>2</sub>O as negative control. The reaction conditions for all Real-Time PCRs were 10 minutes of Taq hotstart activation at 95°C, followed by 45 cycles of 10 seconds of denaturation at 95°C, 20 seconds of annealing at 66°C and 30 seconds at 72°C, and finally one cycle of melting (95°C for 5 seconds, 65°C for 1 minute, ramping from 65°C to 97°C with 0.07°C increments/second). The number of TRECs was calculated according to the following formula: (Mean of TREC quantity/(Mean *GAPDH* quantity/2))  $\times 10^6$  = TREC copies /10<sup>6</sup> leukocytes. The mean quantity of *GAPDH* was divided by 2, to reflect the biallelic nature of this gene.

### *Flow cytometry*

Fresh, whole blood was used to determine the absolute numbers and proportions of T and B lymphocytes and natural killer (NK) cells, as well as the T-helper and T-cytotoxic cell subpopulations, as proposed by the Human Immunophenotyping Consortium with minor modifications [22]. The definitions of cell types, antibodies and dilutions and the flow cytometry gating strategy are provided in Supplemental Tables S1, S2 and Supplemental Fig. S1. Commercially available BD Multitest 6-colour TBNK Reagent and BD Trucount Tubes (BD Biosciences, San Jose, CA) were used according to manufacturer's instructions to enumerate the T and B lymphocytes, NK cells, and T-helper and T-cytotoxic subpopulations. Subsequently, new 100- $\mu\text{l}$  aliquots of whole blood were stained, and the proportions of lymphocytes within the T-helper and T-cytotoxic, B-lymphocyte and T-regulatory subsets were analyzed. Th2 lymphocyte subsets were characterized according to the cell surface expression of chemoattractant receptor-homologous molecules expressed on Th2 cells (CRTH2) using frozen cells as proposed by Cosmi et al. [E1]. The definitions of cell types and information regarding the gating strategy, antibodies and dilutions are provided in Supplemental Tables S1, S2 and Supplemental Fig. S1.

The multicolor analyses were performed on a FACS Canto II flow cytometer and the results were analyzed using the FACSDiva Software ver. 8.0.1 (BD Biosciences). To ensure optimal flow cytometer performance, setup, and reproducibility of the results, CS&T Research Beads (BD Biosciences) were used daily and CD-Chex Plus (Streck, Omaha, NE) was used weekly according to the manufacturers' instructions.

#### *Sorting of lymphocyte subsets and preparation of DNA*

Peripheral blood mononuclear cells (PBMCs) were isolated from whole blood by Ficoll-Paque density gradient centrifugation (GE Healthcare Life Sciences, Little Chalfont, UK). Sorting of B lymphocytes, as well as of naïve and memory T-helper cells and cytotoxic T lymphocytes was performed with more than 95% purity using a flow cytometry-based SY3200 cell sorter (Sony Biotechnology Inc., San Jose, CA). The definitions of cell types and information on the gating strategy, antibodies and dilutions are provided in Supplemental Fig. S2, Supplemental Tables S1 and S2. DNA was isolated from each sorted subset using the QIAamp DNA Mini Kit and QIAcube according to manufacturer's instructions (Qiagen).

#### *Analysis of T-cell receptor repertoires*

Six replicates of 50 ng of DNA were amplified from each sample of the naïve T-helper cells and naïve cytotoxic T lymphocytes, whereas one replicate of 100 ng of DNA was amplified from each sample of the memory T-helper cells and memory cytotoxic T lymphocytes. Rearrangements of *TRB* genes were amplified using 23 V $\beta$  forward primers and 13 J $\beta$  reverse primers (Sigma-Aldrich Chemie N.V., Zwijndrecht, The Netherlands). Pooled PCR products were purified using the MinElute gel extraction kit (Qiagen) and Agencourt AMPure XP beads (Beckman Coulter, Fullerton, CA). The concentrations of the PCR products were quantified using the Qubit 2.0 fluorometer with the Qubit 1 $\times$  dsDNA HS Assay Kit (Thermo Fisher Scientific). On the purified PCR pools, adapter ligation was performed with the Kapa Hyper Prep kit (Roche). Thereafter, the libraries were sequenced on the Illumina MiSeq sequencer with the Miseq reagent kit V3 (Illumina, San Diego, CA). Reads were demultiplexed, trimmed and uploaded to the IMGT High V-Quest software and subsequently analyzed with the ARGalaxy tool, as previously described [23, 24]. Information of V and J gene usage, junctional regions, amino acid compositions and lengths of CDR3 regions was extracted. The analysis was based on sequences that were unique to each DNA replicate. Unique was defined as a rearrangement with a specific V gene that generated a unique amino acid sequence of the CDR3 region. The reoccurrence of a certain rearrangement in any of the six replicates was used for the calculation of clonality scores in naïve T-helper cells and naïve cytotoxic T

lymphocytes, as previously described [25]. Treemap plots of VDJ diversity were generated using R base graphics treemap and RColorBrewer (<https://cran.r-project.org/web/packages/treemap/index.html>; <http://cran.r-project.org/package=RColorBrewer>).

### *Cytokines*

Unstimulated plasma levels of IFN- $\gamma$ , IL-13, IL-17A, IL-21, IL-1 $\beta$ , IL-10, TSLP and CRP were measured using the commercially available V-PLEX assay and the Cytokine and Proinflammatory Panel 1 kits according to manufacturer's instructions (MSD, Rockville, MD). Plasma samples were diluted 2-fold, except for the analysis of CRP, which was diluted 1:1,000. Data were acquired on the Meso Quickplex SQ 120 reader (MSD).

### *Telomere length assessment*

Relative telomere length (RTL) was determined in DNA extracted from sorted naïve and memory T helper cells and cytotoxic T lymphocytes, as well as B lymphocytes using the quantitative PCR method described by Cawthon, with minor modifications [26, 27].

DNA was analyzed in triplicate wells (384-well optical plate) in separate telomere (TEL) and single-copy gene hemoglobin subunit beta (HBB) reactions on the QuantStudio 6 Flex Real-Time PCR instrument (Applied Biosystems), on two separate occasions. DNA was diluted to a concentration of 1.75 ng/ $\mu$ L in TE buffer (10 mM Tris [pH 7.5], 100  $\mu$ M EDTA [pH 8.0]) that contained *Escherichia coli* DNA (1.98 ng/ $\mu$ L). Each reaction contained 10.5 ng DNA, 1X QuantiFast SYBR Green PCR Master mix (Qiagen) and either 400 nM TEL1b forward primer/900 nM TEL2b reverse primer or 400 nM HBB3 forward primer/400 nM HBB4 reverse primer in a total volume of 15  $\mu$ L. (TEL1b, 5'-CGGTTTGGTTGGGTTTGGGTTTGGGTTTGGGTTTGGGTT-3'; TEL2b, 5'-GGCTTGCCTTACCCTTACCCTTACCCTTACCCTTACCCT-3'; HBB3, 5'-TGTGCTGGCCCATCACTTTG-3'; HBB4, 5'-ACCAGCCACCACTTTCTGATAGG-3'). The cycling conditions were 50°C for 1 second, 95°C for 5 minutes, followed by 40 cycles of 95°C for 10 seconds and 56°C for 30 seconds, and ending with a melting curve analysis. TEL and HBB T/S-values were calculated by the  $2^{-\Delta C_t}$  method, where  $\Delta C_t = C_t\text{TEL} - C_t\text{HBB}$ . The RTL value was generated by dividing the T/S value of the sample with the T/S value of a reference cell line (CCRF-CEM), which was included in all the runs. A standard curve of the reference cell line DNA was included in every run to monitor PCR efficiency.

### *Immunoglobulins*

Levels of IgG, IgA, IgM and IgG subclasses were measured in serum samples, according to the manufacturer's instructions, using the Optilite assay and reagents in the Optilite turbidometric analyzer (Binding Site Group Ltd., Birmingham, UK).

### *Specific antibodies*

Commercially available test kits were used for the measurement of specific IgG antibody levels in serum directed against capsular polysaccharides of *Haemophilus influenzae* type b (Hib), *Streptococcus pneumoniae* (Vacczyme; Binding Site Group) and tetanus toxoid (Euroimmun, Lübeck, Germany), as well as for the detection of IgM and IgG antibodies to CMV and EBV (Abbott Laboratories Inc., Abbott Park, IL).

### *FASCIA*

Flow cytometric assays for specific cell-mediated immune responses in activated whole blood (FASCIA) were performed with slight modifications to the previously described protocol [28]. Fresh, heparinized blood was diluted 1:8 in cell culture medium (RPMI1640; BioWhittaker Inc., Walkersville, MD) with 1% L-glutamine, 1% mercaptoethanol and 0.1 mg/mL gentamicin. Aliquots of diluted blood were mixed 4:1 with either polyclonal mitogen to phytohemagglutinin (PHA) (Thermo Fisher Scientific) or pokeweed mitogen (PWM) (Biochrom Ltd., Cambridge, UK) or specific antigenic stimuli to PPD (Statens Serum Institute, Copenhagen, Denmark), Tetanus toxoid (SBL Vaccine AB, Stockholm, Sweden), *Candida albicans* (Stallergenes Greer, London, UK), influenza A (Sanofi, Paris, France), varicella zoster virus (nucleocapsid), CMV (AD169), herpes simplex type 1 virus (nucleocapsid) (all three from Folkhälsomyndigheten, Stockholm, Sweden) or EBV (in-house). The cells were incubated for 7 days in a humidified atmosphere at 37°C in 5% CO<sub>2</sub> in air. After incubation, the cells were stained, followed by lysis of erythrocytes, washing and analysis in a FACSCalibur flow cytometer (BD Biosciences). Information on the antibodies and dilutions used is provided in Table S2 in the Online Repository. The results are expressed as the numbers of T helper or cytotoxic T lymphoblasts per mL.

### *ELISPOT*

An enzyme-linked immunospot assay was used as previously described to assess the immunoglobulin-producing capacities of B lymphocytes *in vitro* [29]. Fresh PBMCs were stimulated with either the polyclonal T lymphocyte-dependent mitogen PWM (Sigma-Aldrich, St. Louis, MO) or the T lymphocyte-independent mitogen EBV (in-house), followed by incubation for 6 days in cell culture medium (RPMI 1640; Lonza, Basel,

Switzerland) supplemented with 10% heat-inactivated fetal calf serum (Sigma-Aldrich) in a humidified atmosphere at 37°C in CO<sub>2</sub>. Control cultures were incubated in medium without stimulants. The cells were then washed, and incubated in four-fold dilutions (stimulated: 10<sup>4</sup>, 2×10<sup>3</sup>, 4×10<sup>2</sup>, 8×10<sup>1</sup> PBMCs per well; unstimulated: 10<sup>5</sup>, 2×10<sup>4</sup>, 8×10<sup>4</sup>, 4×10<sup>3</sup>, 8×10<sup>2</sup> PBMCs per well) for 5 hours at 37°C with 5% CO<sub>2</sub> on nitrocellulose plates (Millipore Inc., Burlington, MA) coated overnight with goat anti human IgG (Jackson ImmunoResearch Europe Ltd., Ely, Cambridgeshire, UK) and blocked with 5% fetal calf serum. Zones of released immunoglobulin around individual cells were visualized by adding biotinylated goat anti-human IgG, IgA or IgM (Sigma-Aldrich), followed by avidin conjugated with alkaline phosphatase (Sigma-Aldrich) and developed with NBT/BCIP Solution (Mabtech AB, Nacka Strand, Sweden). The number of spots in each well, corresponding to the number of antibody-producing cells, was counted in a standardized way. Results are reported as number of spots per 10<sup>6</sup> PBMCs.

#### *Statistical analysis, OPLS-DA*

Orthogonal partial least squares discriminant analysis (OPLS-DA) was used to identify and visualize discriminating prospectively collected immunologic and clinical data. A list of the included *X*-variables is provided (Table S3 in the Online Repository). In order to normalize the data, all the *X*-variables were log-transformed. The scale presented on the *y*-axis of the OPLS plot is dimensionless and the loading vector is normalized to unit length. The quality of the OPLS analyses is assessed by the parameters R<sup>2</sup><sub>Y</sub> and Q<sup>2</sup>, where R<sup>2</sup><sub>Y</sub> indicates how well the variation of variables is explained by the model, and Q<sup>2</sup> estimates how well a variable can be predicted by the model (Q<sup>2</sup> >0.5 indicates good predictability). The contribution of each *X*-variable to the OPLS model was calculated, and the variables that contributed the most are presented in the final OPLS-DA column loading plots. For each OPLS-DA column loading plot, the variable influence on projection (VIP) values are indicated. VIP values can be used to discriminate between important and unimportant predictors for the model. Univariate statistical analyses were performed to verify the multivariate findings for the *X*-variables that contributed most to the respective multivariate models.

#### References

E1. Cosmi L, Annunziato F, Iwasaki M, Galli G, Manetti R, Maggi E, et al. CRTH2 is the most reliable marker for the detection of circulating human type 2 Th and type 2 T cytotoxic cells in health and disease. *Eur J Immunol.* 2000;30:2972-9.

**Table S1.**

**Definition of cell types**

| Cell type                                                   | Abbreviation                               | Cell surface marker                                                                                                                             |
|-------------------------------------------------------------|--------------------------------------------|-------------------------------------------------------------------------------------------------------------------------------------------------|
| <b>T-helper lymphocytes</b>                                 | CD4                                        | CD3 <sup>+</sup> CD4 <sup>+</sup>                                                                                                               |
| Naïve T-helper lymphocytes*                                 | CD4 naïve                                  | CD3 <sup>+</sup> CD4 <sup>+</sup> CCR7 <sup>+</sup> CD45RA <sup>+</sup>                                                                         |
| Recent thymic emigrants                                     | RTE                                        | CD3 <sup>+</sup> CD4 <sup>+</sup> CCR7 <sup>+</sup> CD45RA <sup>+</sup> CD31 <sup>+</sup>                                                       |
| Memory T-helper lymphocytes <sup>#</sup>                    | CD4 memory                                 |                                                                                                                                                 |
| Central memory T-helper lymphocytes*                        | CD4 cent mem                               | CD3 <sup>+</sup> CD4 <sup>+</sup> CCR7 <sup>+</sup> CD45RA <sup>-</sup>                                                                         |
| Effector memory T-helper lymphocytes*                       | CD4 eff mem                                | CD3 <sup>+</sup> CD4 <sup>+</sup> CCR7 <sup>-</sup> CD45RA <sup>-</sup>                                                                         |
| Effector T-helper lymphocytes*                              | CD4 effector                               | CD3 <sup>+</sup> CD4 <sup>+</sup> CCR7 <sup>-</sup> CD45RA <sup>+</sup>                                                                         |
| CD45RA <sup>+</sup> effector memory T-helper lymphocytes    | CD4 EMRA                                   | CD3 <sup>+</sup> CD4 <sup>+</sup> CCR7 <sup>-</sup> CD45RA <sup>low</sup>                                                                       |
| Th1                                                         | Th1                                        | CD3 <sup>+</sup> CD4 <sup>+</sup> CCR7 <sup>+</sup> CD45RA <sup>-</sup><br>CXCR3 <sup>+</sup> CCR6 <sup>-</sup>                                 |
| Th2                                                         | Th2                                        | CD3 <sup>+</sup> CD4 <sup>+</sup> CD8 <sup>-</sup> CD45RA <sup>-</sup> CRTH2 <sup>+</sup>                                                       |
| Th17                                                        | Th17                                       | CD3 <sup>+</sup> CD4 <sup>+</sup> CCR7 <sup>+</sup> CD45RA <sup>-</sup> CXCR3 <sup>-</sup> CCR6 <sup>+</sup>                                    |
| <b>T regulatory lymphocytes</b>                             | T reg                                      | CD3 <sup>+</sup> CD4 <sup>+</sup> CCR4 <sup>+</sup> CD25 <sup>hi</sup> CD127 <sup>low</sup>                                                     |
| Naïve T-regulatory lymphocytes*                             | T reg naïve                                | CD3 <sup>+</sup> CD4 <sup>+</sup> CCR4 <sup>+</sup> CD25 <sup>hi</sup> CD127 <sup>low</sup> CD45RO <sup>-</sup>                                 |
| Memory T-regulatory lymphocytes*                            | T reg mem                                  | CD3 <sup>+</sup> CD4 <sup>+</sup> CCR4 <sup>+</sup> CD25 <sup>hi</sup> CD127 <sup>low</sup> CD45RO <sup>+</sup>                                 |
| <b>Cytotoxic T lymphocytes</b>                              | CD8                                        | CD3 <sup>+</sup> CD8 <sup>+</sup>                                                                                                               |
| Naïve cytotoxic T lymphocytes*                              | CD8 naïve                                  | CD3 <sup>+</sup> CD8 <sup>+</sup> CCR7 <sup>+</sup> CD45RA <sup>+</sup>                                                                         |
| Memory cytotoxic T lymphocytes <sup>#</sup>                 | CD8 memory                                 |                                                                                                                                                 |
| Central memory cytotoxic T lymphocytes*                     | CD8 cent mem                               | CD3 <sup>+</sup> CD8 <sup>+</sup> CCR7 <sup>+</sup> CD45RA <sup>-</sup>                                                                         |
| Effector memory cytotoxic T lymphocytes*                    | CD8 eff mem                                | CD3 <sup>+</sup> CD8 <sup>+</sup> CCR7 <sup>-</sup> CD45RA <sup>-</sup>                                                                         |
| Effector cytotoxic T lymphocytes*                           | CD8 effector                               | CD3 <sup>+</sup> CD8 <sup>+</sup> CCR7 <sup>-</sup> CD45RA <sup>+</sup>                                                                         |
| CD45RA <sup>+</sup> effector memory cytotoxic T lymphocytes | CD8 EMRA                                   | CD3 <sup>+</sup> CD8 <sup>+</sup> CCR7 <sup>-</sup> CD45RA <sup>low</sup>                                                                       |
| <b>Double-positive T lymphocytes</b>                        | DP                                         | CD3 <sup>+</sup> CD4 <sup>+</sup> CD8 <sup>+</sup>                                                                                              |
| <b>γδ T lymphocytes</b>                                     | γδ                                         | CD3 <sup>+</sup> TCRαβ <sup>-</sup> TCRγδ <sup>+</sup> CD4 <sup>-</sup> CD8 <sup>-</sup>                                                        |
| <b>B lymphocytes</b>                                        | CD19                                       | CD3 <sup>-</sup> CD19 <sup>+</sup>                                                                                                              |
| Naïve B lymphocytes                                         | CD19 naïve                                 | CD3 <sup>-</sup> CD19 <sup>+</sup> CD20 <sup>+</sup> CD27 <sup>-</sup><br>24 <sup>low</sup> 38 <sup>low</sup> IgD <sup>+</sup> IgM <sup>+</sup> |
| Transitional B lymphocytes                                  | CD19 transitional                          | CD3 <sup>-</sup> CD19 <sup>+</sup> CD20 <sup>+</sup> CD27 <sup>+</sup> 24 <sup>hi</sup> 38 <sup>hi</sup> IgD <sup>+</sup> IgM <sup>+</sup>      |
| IgD <sup>+</sup> IgM <sup>+</sup> memory B lymphocytes      | CD19 IgD <sup>+</sup> IgM <sup>+</sup> mem | CD3 <sup>-</sup> CD19 <sup>+</sup> CD20 <sup>+</sup> CD27 <sup>+</sup> IgD <sup>+</sup> IgM <sup>+</sup>                                        |
| IgM <sup>+</sup> only memory B lymphocytes                  | CD19 IgM <sup>+</sup> only mem             | CD3 <sup>-</sup> CD19 <sup>+</sup> CD20 <sup>+</sup> CD27 <sup>+</sup> IgD <sup>-</sup> IgM <sup>+</sup>                                        |
| Class-switched memory B lymphocytes                         | CD19 Class switched                        | CD3 <sup>-</sup> CD19 <sup>+</sup> CD20 <sup>+</sup> CD27 <sup>+</sup> IgD <sup>-</sup> IgM <sup>+</sup>                                        |
| Plasmablasts                                                | Plasmablasts                               | CD3 <sup>-</sup> CD19 <sup>+</sup> CD20 <sup>+</sup> CD38 <sup>+</sup> CD27 <sup>hi</sup>                                                       |
| <b>NK cells</b>                                             | NK                                         | CD3 <sup>-</sup> CD56 <sup>+</sup> 16 <sup>+</sup>                                                                                              |

\*With CD38<sup>+</sup>DR<sup>+</sup> as markers of activation (act).

<sup>#</sup>For cell sorting, memory T lymphocytes were defined as CD45RA<sup>-</sup>, i.e., effector and EMRA subsets were not included.

CD, Cluster of differentiation; CCR, chemokine C receptor; CXCR, chemokine CX receptor; CRTH, chemoattractant receptor homologous molecule expressed on Th2 cells; NK, natural killer.

**Table S2.**

**Antibodies used in the study**

| <b>Flow cytometry panel</b>                      | <b>Antibody<sup>#</sup></b>      | <b>Clone</b>       | <b>Dilution factor</b>                                                     |
|--------------------------------------------------|----------------------------------|--------------------|----------------------------------------------------------------------------|
| <b>TBNK Complete Lymphocyte Subset Panel</b>     | 6-colour reagent                 | Catalog no. 644611 | 5                                                                          |
|                                                  | CD45-PerCP-Cy 5.5                |                    |                                                                            |
|                                                  | CD3-FITC                         |                    |                                                                            |
|                                                  | CD4-PE-Cy7                       |                    |                                                                            |
|                                                  | CD8-APC-Cy7                      |                    |                                                                            |
|                                                  | CD19-APC                         |                    |                                                                            |
|                                                  | CD16/56-PE                       |                    |                                                                            |
| <b>T lymphocytes</b>                             |                                  |                    |                                                                            |
|                                                  | CD3-V450                         | UCHT1              | 40                                                                         |
|                                                  | CD4-PerCP-Cy 5.5                 | SK3                | 10                                                                         |
|                                                  | CD8-APC-H7                       | SK1                | 40                                                                         |
|                                                  | CD45RA-PE-CY7                    | L48                | 40                                                                         |
|                                                  | CD31-FITC                        | WM59               | 40                                                                         |
|                                                  | CCR7-PE                          | 150503             | 40                                                                         |
|                                                  | CD38-APC                         | HB7                | 40                                                                         |
|                                                  | HLA-DR-V500                      | G46-6              | 40                                                                         |
| <b>T regulatory lymphocytes</b>                  |                                  |                    |                                                                            |
|                                                  | CD3-V450                         | UCHT1              | 40                                                                         |
|                                                  | CD4-PerCP-Cy 5.5                 | SK3                | 10                                                                         |
|                                                  | CD45RO-APC-H7                    | UCHL1              | 40                                                                         |
|                                                  | CCR7-FITC                        | 150503             | 40                                                                         |
|                                                  | CD25-PE                          | 2A3                | 10                                                                         |
|                                                  | CCR4-PE-CY7                      | 1G1                | 40                                                                         |
|                                                  | CD127-APC                        | eBioRDR5           | 40                                                                         |
|                                                  | HLA-DR-V500                      | G46-6              | 40                                                                         |
| <b>Th1 and Th17 subsets</b>                      |                                  |                    |                                                                            |
|                                                  | CD3-V450                         | UCHT1              | 40                                                                         |
|                                                  | CD4-PerCP-Cy 5.5                 | SK3                | 10                                                                         |
|                                                  | CXCR3-PE                         | 1C6/CXCR3          | 10                                                                         |
|                                                  | CCR6-PE-CY7                      | 11A9               | 40                                                                         |
| <b>Th2 and <math>\gamma\delta</math> subsets</b> |                                  |                    |                                                                            |
|                                                  | CRTh2-PE                         | BM16               | 20                                                                         |
|                                                  | CD3-V450                         | UCHT1              | 40                                                                         |
|                                                  | CD4-APC-R700                     | RPA-T4             | 20                                                                         |
|                                                  | CD8-PE-Cy7                       | RPA-T8             | 50                                                                         |
|                                                  | CD45RA-APC-H7                    | HI100              | 20                                                                         |
|                                                  | TCR $\alpha\beta$ -BV510         | T10B9.1A-31        | 20                                                                         |
|                                                  | TCR $\gamma\delta$ -PerCP-Cy 5.5 | B1                 | 20                                                                         |
| <b>B lymphocytes</b>                             |                                  |                    |                                                                            |
|                                                  | CD19-PerCP-Cy 5.5                | SJ25C1             | 10                                                                         |
|                                                  | CD20-APC-H7                      | L27                | 40                                                                         |
|                                                  | CD27-PE-CY7                      | M-T271             | 40                                                                         |
|                                                  | CD38-APC                         | HB7                | 40                                                                         |
|                                                  | IgM-BB515                        | G20-127            | 40                                                                         |
|                                                  | IgD-V500                         | IA6-2              | 40                                                                         |
| <b>FASCIA<sup>##</sup></b>                       |                                  |                    |                                                                            |
|                                                  | CD3-PerCP                        | SK7                | 10                                                                         |
|                                                  | CD4-APC                          | SK3                | 50                                                                         |
|                                                  | CD8-PE                           | SK1                | 33                                                                         |
| <b>Sorting of Lymphocytes</b>                    |                                  |                    | <b>Added volume antibody<br/>(<math>\mu</math>l /10<sup>6</sup> cells)</b> |
|                                                  | CD3-V450                         | UCHT1              | 2                                                                          |
|                                                  | CD4-PerCP-Cy5.5                  | SK3                | 4                                                                          |
|                                                  | CD25-PE                          | 2A3                | 4                                                                          |
|                                                  | CD127-APC                        | eBioRDR5           | 1                                                                          |
|                                                  | CD45RA-PeCy7                     | L48                | 1                                                                          |
|                                                  | CCR7-FITC                        | 150503             | 2                                                                          |
|                                                  | CD8-APC-H7*                      | SK1                | 0.5                                                                        |
|                                                  | CD19-APC-H7 <sup>†</sup>         | HIB19              | 2                                                                          |

<sup>#</sup>All antibodies were from BD Biosciences, with the exception of CD127-APC, which was provided by Thermo Fischer Scientific (Waltham, MA).

<sup>##</sup>FASCIA, flow cytometric assay for specific cell-mediated immune responses in activated whole blood.

<sup>†</sup>Only used in sorting panel 1.

\*Only used in sorting panel 2.



**Table S3.**

**Variables included in the OPLS-DA model**

| <b>Clinical diagnosis</b>            | RTE count                         | CD19 count                | <b>Clonality scores</b>         |
|--------------------------------------|-----------------------------------|---------------------------|---------------------------------|
| Heart defect                         | %CD4 memory                       | %CD19 naïve               | ClonalityCD4naïve <sup>b</sup>  |
| Autoimmunity                         | CD4 memory count                  | CD19 naïve count          | ClonalityCD8naïve <sup>c</sup>  |
| Significant viral infections         | %CD4 cent mem*                    | %CD19 transitional        |                                 |
| Prolonged viral infections           | CD4 cent mem count*               | CD19 transitional count   | <b>Immunoglobulins</b>          |
| Significant bacterial infections     | %CD4 eff mem*                     | %CD19 IgD+IgM+ mem        | Total IgG                       |
| <i>Candida</i>                       | CD4 eff mem count*                | CD19 IgD+IgM+ mem count   | Total IgA                       |
| Asthma/allergy                       | %CD4 effector                     | %CD19 IgM+ only mem       | Total IgM                       |
| Neurodevelopmental                   | CD4 effector count                | CD19 IgM+ only mem count  | IgG1                            |
|                                      | %CD4 EMRA*                        | %CD19 Class-switched mem  | IgG2                            |
| <b>Blood counts</b>                  | CD4 EMRA count                    | CD19 Class-switched count | IgG3                            |
| Hemoglobin                           | %Th1                              | %Plasmablasts             | IgG4                            |
| Leucocytes                           | Th1 count                         | Plasmablasts count        |                                 |
| Platelets                            | %Th2 <sup>2</sup>                 | %NK                       | <b>ELISPOT<sup>d</sup></b>      |
| Neutrophils                          | %Th17                             | NK count                  | Elispot IgM unstimulated        |
| Eosinophils                          | Th17 count                        |                           | Elispot IgG unstimulated        |
| Lymphocytes                          | % $\gamma\delta$ CD4 <sup>a</sup> | <b>TRECs</b>              | Elispot IgA unstimulated        |
| Eosinophils                          | % $\gamma\delta$ CD8 <sup>a</sup> |                           | Elispot IgM EBV                 |
| Monocytes                            | % $\gamma\delta$ <sup>2</sup>     | <b>FASCIA</b>             | Elispot IgG EBV                 |
| Basophils                            | %CD8                              | CD4-unstimulated          | Elispot IgA EBV                 |
|                                      | CD8 count                         | CD4-PHA                   | Elispot IgM PWM                 |
| <b>Thyroid/parathyroid</b>           | %CD8 naïve*                       | CD4-PWM                   | Elispot IgG PWM                 |
| T4                                   | CD8 naïve count                   | CD4-PPD                   | Elispot IgA PWM                 |
| TSH                                  | %CD8 memory                       | CD4-Tetanus toxoid        |                                 |
| Ionized calcium                      | CD8 memory count                  | CD4- <i>Candida</i>       | <b>Cytokines<sup>e</sup></b>    |
| Parathyroid hormone                  | %CD8 cent mem*                    | CD4-Influenza A           | IFN- $\gamma$                   |
|                                      | CD8 cent mem count                | CD4-CMV                   | IL-13 <sup>f</sup>              |
| <b>Specific IgG antibodies</b>       | %CD8 eff mem*                     | CD4-EBV                   | IL-17A                          |
| Tetanus toxoid                       | CD8 eff mem count*                | CD4-VZV                   | IL-21 <sup>g</sup>              |
| <i>Streptococcus pneumoniae</i>      | %CD8 effector*                    | CD4-HSV1                  | IL-1 $\beta$ <sup>h</sup>       |
| <i>Haemophilus influenzae</i> type B | CD8 effector count*               | CD8-unstimulated          | IL-10                           |
| CMV                                  | %CD8 EMRA*                        | CD8-PHA                   | TSLP                            |
| EBV                                  | CD8 EMRA count*                   | CD8-PWM                   | CRP                             |
|                                      | %DP                               | CD8-PPD                   |                                 |
| <b>Lymphocyte populations</b>        | %T reg                            | CD8-Tetanus toxoid        | <b>Relative telomere length</b> |
| CD3 count                            | T reg counts                      | CD8- <i>Candida</i>       | RTLCD4naïve <sup>i</sup>        |
| %CD4                                 | %T reg naïve                      | CD8-Influenza A           | RTLCD4mem <sup>j</sup>          |
| CD4 count                            | T reg naïve count                 | CD8-CMV                   | RTLCD8naïve <sup>k</sup>        |
| %CD4 naïve*                          | %T reg mem*                       | CD8-EBV                   | RTLCD8mem <sup>l</sup>          |
| CD4 naïve count                      | T reg mem count*                  | CD8-VZV                   | RTLCD19 <sup>m</sup>            |
| % RTE                                | %CD19                             | CD8-HSV1                  |                                 |

OPLS-DA, Orthogonal projection to latent structures by means of partial least squares discriminant analysis; T4, thyroxine; TSH, thyroid stimulating hormone; CMV, cytomegalovirus; EBV, Epstein-Barr virus; RTE, recent thymic emigrants; FASCIA, flow cytometric assay for specific cell-mediated immune response in activated whole blood; ELISPOT, enzyme-linked immunospot assay; PHA, phytohemagglutinin; PWM, pokeweed mitogen; VZV, varicella zoster virus; HSV1, herpes simplex virus 1; PPD purified protein derivative; TSLP, thymic stromal lymphopoietin; RTL, relative telomere length. Definitions of cell types and abbreviations are provided in Table E1 in the Online Repository. \*Corresponding activated subset was included as a separate variable (act).

<sup>a</sup>Data missing from two 22q11Low individuals, two 22q11Normal and one healthy control.

<sup>b</sup>Data missing from three 22q11Normal individuals and one healthy control.

<sup>c</sup>Data missing from three 22q11Low, two 22q11Normal individuals and one healthy control.

<sup>d</sup>Data missing from one 22q11Low individual.

<sup>e</sup>Data missing from one healthy control.

<sup>f</sup>Data from four 22q11Low and four 22q11Normal individuals were below the detection range and excluded.

<sup>g</sup>Data from four 22q11Low, three 22q11Normal individuals and four healthy controls were below the detection range and excluded.

<sup>h</sup>Data from one 22q11Low individual were below detection range and excluded.

<sup>i</sup>Data missing from two 22q11Low, three 22q11Normal individuals and one healthy control.

<sup>j</sup>Data missing from one 22q11Low, four 22q11Normal individuals and three healthy controls.

<sup>k</sup>Data missing from three 22q11Normal individuals and two healthy controls.

<sup>l</sup>Data missing from two 22q11Low, four 22q11Normal individuals and four healthy controls.

<sup>m</sup>Data missing from two 22q11Normal individuals and one healthy control.

## Supplemental Table S4.

### Characteristics of deceased patients with low TRECs

| TREC on NBS (copies/ $\mu$ l) | Age at diagnosis (months) | Age at death (months) | Gender | T lymphocytes ( $\times 10^9/L$ )* at diagnosis | Heart defect              | Thymus appearance at surgery or MRI | Other malformations and deformities                | Hypocalcemia | Significant infections                                                          | Cause of death                                                        |
|-------------------------------|---------------------------|-----------------------|--------|-------------------------------------------------|---------------------------|-------------------------------------|----------------------------------------------------|--------------|---------------------------------------------------------------------------------|-----------------------------------------------------------------------|
| 0                             | 3.5                       | 5                     | F      | CD3 0<br>CD4 0<br>CD8 0                         | Right aortic arch         | Non-visible                         | None                                               | Neonatal     | CMV                                                                             | CMV                                                                   |
| 1.7                           | < 1                       | 3.5                   | M      | CD3 510<br>CD4 360<br>CD8 130                   | TA <i>type 2</i> ,<br>VSD | Non-visible                         | Mb<br>Hirschsprung<br>IVH,<br>hydrocephalus<br>VFI | Neonatal     |                                                                                 | Respiratory insufficiency secondary to aspiration and cardiac failure |
| 8.8                           | < 1                       | 8                     | F      | CD3 900<br>CD4 650<br>CD8 250                   | TA <i>type 3</i>          | Non-visible                         | Omphalocele<br>Talipes<br>equinovarus              | Neonatal     | Recurrent fever of unknown origin<br><i>Stenotrophomonas maltophilia</i> in BAL | Bronchospasm and cardiac failure during anesthesia for BAL            |

NBS, Newborn screening; MRI, magnetic resonance imaging; F, female; M, male; TA, truncus arteriosus; VSD, ventricular septal defect; IVH, intra ventricular hemorrhage; VFI, velopharyngeal insufficiency; CMV, cytomegalovirus; RTI, respiratory tract infection; BAL, bronchoalveolar lavage. \* Data not available for naive T cell counts.

**Table S5.**

**TREC levels and counts and proportions of lymphocyte populations at follow-up**

|                                               | 22q11Low<br>N=10<br>(Median) | Interquartile<br>Range | 22q11Normal<br>N=10<br>(Median) | Interquartile<br>Range | Healthy<br>Controls<br>N=10<br>(Median) | Interquartile<br>Range | Adjusted<br>P-value<br>22q11Low<br>vs. HC | Adjusted<br>P-value<br>22q11Low vs.<br>22q11Normal |
|-----------------------------------------------|------------------------------|------------------------|---------------------------------|------------------------|-----------------------------------------|------------------------|-------------------------------------------|----------------------------------------------------|
| TREC (copies/10 <sup>6</sup> cells)           | 477                          | 140–930                | 1,710                           | 901–3,823              | 3,195                                   | 1,437–6,915            | <.001                                     | <.05                                               |
| Lymphocytes (×10 <sup>9</sup> /L)             | 1500                         | 1,250–1,975            | 1,350                           | 953–2,000              | 1,700                                   | 1,375–2,225            | >.99                                      | >.99                                               |
| CD3 (×10 <sup>9</sup> /L)                     | 835                          | 715–1,150              | 890                             | 630–1,300              | 1,350                                   | 1,075–1,575            | <.05                                      | >.99                                               |
| %CD3 of lymphocytes                           | 59                           | 50–62                  | 64                              | 61–70                  | 77                                      | 71–83                  | <.001                                     | .22                                                |
| CD4 (×10 <sup>9</sup> /L)                     | 450                          | 392–607                | 565                             | 372–740                | 745                                     | 615–990                | <.05                                      | .31                                                |
| %CD4 of CD3                                   | 56                           | 49–63                  | 58                              | 49–71                  | 59                                      | 51–67                  | >.99                                      | >.99                                               |
| CD4 naïve (×10 <sup>9</sup> /L)               | 195                          | 125–262                | 295                             | 185–485                | 475                                     | 385–627                | <.001                                     | .31                                                |
| %CD4 naïve of CD4                             | 44                           | 28–48                  | 56                              | 49–69                  | 63                                      | 60–69                  | <.001                                     | <.05                                               |
| %CD4 naïve act of CD3                         | 0                            | 0–0                    | 0                               | 0–0.03                 | 0                                       | 0–0.03                 | .53                                       | .66                                                |
| RTE (×10 <sup>9</sup> /L)                     | 125                          | 88–185                 | 240                             | 143–343                | 350                                     | 303–488                | <.001                                     | .27                                                |
| %RTE of CD4                                   | 29                           | 21–36                  | 43                              | 39–55                  | 49                                      | 41–52                  | <.001                                     | <.01                                               |
| CD4 mem (×10 <sup>9</sup> /L)                 | 295                          | 208–415                | 235                             | 198–295                | 260                                     | 203–373                | >.99                                      | .56                                                |
| %CD4 mem of CD4                               | 59                           | 52–71                  | 44                              | 31–49                  | 35                                      | 29–43                  | <.0001                                    | <.05                                               |
| CD4 cent mem (×10 <sup>9</sup> /L)            | 160                          | 110–248                | 160                             | 105–183                | 160                                     | 108–213                | >.99                                      | >.99                                               |
| CD4 cent mem act (×10 <sup>9</sup> /L)        | 0                            | 0–0                    | 0                               | 0–0                    | 0                                       | 0–0                    | .66                                       | >.99                                               |
| %CD4 cent mem of CD4                          | 34                           | 29–41                  | 23                              | 19–34                  | 21                                      | 17–27                  | <.01                                      | .15                                                |
| %CD4 cent mem act of CD3                      | 0.2                          | 0.1–0.3                | 0.2                             | 0.1–0.3                | 0.1                                     | 0–0.2                  | >.99                                      | >.99                                               |
| CD4 eff mem (×10 <sup>9</sup> /L)             | 110                          | 75–145                 | 80                              | 75–110                 | 95                                      | 58–133                 | >.99                                      | .59                                                |
| CD4 eff mem act (×10 <sup>9</sup> /L)         | 0                            | 0–0                    | 0                               | 0–0                    | 0                                       | 0–0.01                 | .59                                       | >.99                                               |
| %CD4 eff mem of CD4                           | 23                           | 17–29                  | 13                              | 11–22                  | 11                                      | 8–18                   | <.05                                      | .20                                                |
| %CD4 eff mem act of CD3                       | 0.7                          | 0.4–0.9                | 0.4                             | 0.3–0.8                | 0.3                                     | 0.2–0.4                | .09                                       | >.99                                               |
| CD4 effector (×10 <sup>9</sup> /L)            | 0                            | 0–0.005                | 0                               | 0–0                    | 0                                       | 0–0.003                | >.99                                      | >.99                                               |
| %CD4 effector of CD4                          | 0                            | 0–0.006                | 0                               | 0–0                    | 0                                       | 0–0.005                | >.99                                      | >.99                                               |
| CD4 EMRA (×10 <sup>9</sup> /L)                | 0                            | 0–0.003                | 0                               | 0–0                    | 0.01                                    | 0–0.02                 | .07                                       | >.99                                               |
| %CD4 EMRA of CD4                              | 0                            | 0–0.005                | 0                               | 0–0                    | 0.02                                    | 0–0.03                 | .01                                       | >.99                                               |
| %CD4 EMRA act of CD3                          | 0                            | 0–0                    | 0                               | 0–0                    | 0                                       | 0–0.1                  | .27                                       | >.99                                               |
| T reg (×10 <sup>9</sup> /L)                   | 35                           | 18–40                  | 45                              | 38–83                  | 55                                      | 40–73                  | <.05                                      | .14                                                |
| %T reg of CD4                                 | 6.9                          | 5.5–8.1                | 7.1                             | 6.0–7.8                | 7.5                                     | 6.7–8.9                | .49                                       | >.99                                               |
| T reg naïve (×10 <sup>9</sup> /L)             | 15                           | 0–20                   | 30                              | 10–45                  | 35                                      | 28–50                  | <.01                                      | .12                                                |
| %T reg naïve of CD4                           | 2.8                          | 1.9–4.6                | 4.0                             | 3.0–4.7                | 5.1                                     | 4.4–6.2                | <.05                                      | >.99                                               |
| T reg mem (×10 <sup>9</sup> /L)               | 20                           | 10–20                  | 20                              | 20–30                  | 20                                      | 10–30                  | >.99                                      | .73                                                |
| T reg mem act (×10 <sup>9</sup> /L)           | 0                            | 0–10                   | 5                               | 0–10                   | 5                                       | 0–10                   | >.99                                      | >.99                                               |
| %T reg mem of CD4                             | 3.7                          | 3.3–4.6                | 3.1                             | 2.3–3.9                | 2.6                                     | 2.2–2.9                | <.01                                      | .40                                                |
| %T reg mem act of CD3                         | 1.7                          | 1.4–2.5                | 1.5                             | 0.8–2                  | 0.9                                     | 0.7–0.9                | <.05                                      | >.99                                               |
| Th1 (×10 <sup>9</sup> /L)                     | 105                          | 80–170                 | 85                              | 80–100                 | 135                                     | 98–173                 | >.99                                      | .72                                                |
| %Th1 of CD4                                   | 22                           | 21–25                  | 19                              | 11–24                  | 16                                      | 14–20                  | <.05                                      | .14                                                |
| %Th2 of CD4 <sup>a</sup>                      | 1.5                          | 0.5–3.0                | 0.8                             | 0.6–1.1                | 0.7                                     | 0.5–1.3                | .52                                       | >.99                                               |
| Th17 (×10 <sup>9</sup> /L)                    | 65                           | 48–105                 | 50                              | 40–70                  | 45                                      | 30–60                  | .08                                       | .49                                                |
| %Th17 of CD4                                  | 15                           | 11–16                  | 9                               | 7–15                   | 6                                       | 4–8                    | <.001                                     | .08                                                |
| CD8 (×10 <sup>9</sup> /L)                     | 330                          | 222–410                | 290                             | 220–395                | 425                                     | 327–535                | .32                                       | >.99                                               |
| %CD8 of CD3                                   | 35                           | 29–40                  | 30                              | 24–36                  | 32                                      | 25–40                  | >.99                                      | .81                                                |
| CD8 naïve (×10 <sup>9</sup> /L)               | 80                           | 37–125                 | 150                             | 97–232                 | 245                                     | 155–287                | <.01                                      | .35                                                |
| %CD8 naïve of CD8                             | 30                           | 10–57                  | 52                              | 41–58                  | 59                                      | 43–65                  | <.05                                      | .35                                                |
| %CD8 naïve act of CD3                         | 0                            | 0–0                    | 0                               | 0–0.03                 | 0                                       | 0–0                    | >.99                                      | .23                                                |
| CD8 mem (×10 <sup>9</sup> /L)                 | 235                          | 133–260                | 130                             | 90–185                 | 175                                     | 123–280                | >.99                                      | .20                                                |
| %CD8 mem of CD8                               | 69                           | 44–87                  | 45                              | 40–59                  | 42                                      | 35–58                  | .062                                      | .25                                                |
| CD8 cent mem (×10 <sup>9</sup> /L)            | 35                           | 18–70                  | 20                              | 18–30                  | 20                                      | 18–38                  | .61                                       | .51                                                |
| %CD8 cent mem of CD8                          | 136                          | 71–166                 | 75                              | 47–130                 | 58                                      | 34–84                  | <.05                                      | .63                                                |
| %CD8 cent mem act of CD3                      | 0                            | 0–0.2                  | 0                               | 0–0                    | 0                                       | 0–0                    | .95                                       | .87                                                |
| CD8 eff mem (×10 <sup>9</sup> /L)             | 60                           | 18–95                  | 45                              | 30–68                  | 60                                      | 23–128                 | >.99                                      | >.99                                               |
| CD8 eff mem act (×10 <sup>9</sup> /L)         | 0                            | 0–0.01                 | 0                               | 0–0.01                 | 0                                       | 0–0                    | >.99                                      | >.99                                               |
| %CD8 eff mem of CD8                           | 17                           | 10–33                  | 16                              | 10–24                  | 14                                      | 6–30                   | >.99                                      | >.99                                               |
| %CD8 eff mem act of CD3                       | 0.6                          | 0.3–1.2                | 0.4                             | 0.16–1                 | 0.4                                     | 0.15–0.7               | .8                                        | >.99                                               |
| CD8 effector (×10 <sup>9</sup> /L)            | 20                           | 8–53                   | 20                              | 10–33                  | 35                                      | 20–50                  | .63                                       | >.99                                               |
| CD8 effector act (×10 <sup>9</sup> /L)        | 0                            | 0–0.1                  | 0                               | 0–0                    | 0                                       | 0–0                    | .23                                       | .23                                                |
| %CD8 effector of CD8                          | 5                            | 2–17                   | 8                               | 4–11                   | 7                                       | 5–13                   | >.99                                      | >.99                                               |
| %CD8 effector act of CD3                      | 0.2                          | 0–0.6                  | 0                               | 0–0.2                  | 0.1                                     | 0–0.2                  | >.99                                      | .40                                                |
| CD8 EMRA (×10 <sup>9</sup> /L)                | 60                           | 28–120                 | 35                              | 20–53                  | 60                                      | 40–70                  | >.99                                      | .52                                                |
| CD8 EMRA act (×10 <sup>9</sup> /L)            | 0                            | 0–0.1                  | 0                               | 0–0                    | 0                                       | 0–0.003                | >.99                                      | .51                                                |
| %CD8 EMRA of CD8                              | 20                           | 9–36                   | 14                              | 8–17                   | 12                                      | 11–16                  | .82                                       | .84                                                |
| %CD8 EMRA act of CD3                          | 0.4                          | 0–0.7                  | 0.1                             | 0–0.2                  | 0.2                                     | 0.1–0.4                | >.99                                      | .10                                                |
| %DP of CD3                                    | 0.5                          | 0.3–0.9                | 0.8                             | 0.5–1.2                | 0.6                                     | 0.3–0.7                | >.99                                      | .34                                                |
| %γδ of CD3 <sup>a</sup>                       | 6                            | 3–11                   | 4                               | 3–5                    | 10                                      | 4–16                   | >.99                                      | .49                                                |
| CD19 (×10 <sup>9</sup> /L)                    | 285                          | 195–398                | 255                             | 120–370                | 215                                     | 160–260                | .27                                       | >.99                                               |
| %CD19 of lymphocytes                          | 19                           | 16–25                  | 19                              | 12–22                  | 12                                      | 10–15                  | <.05                                      | >.99                                               |
| CD19 naïve (×10 <sup>9</sup> /L)              | 215                          | 148–265                | 185                             | 93–253                 | 125                                     | 80–163                 | <.05                                      | .96                                                |
| %CD19 naïve of CD19                           | 70                           | 67–79                  | 74                              | 68–80                  | 60                                      | 56–65                  | <.01                                      | >.99                                               |
| CD19 transitional (×10 <sup>9</sup> /L)       | 20                           | 0–73                   | 20                              | 8–33                   | 20                                      | 10–23                  | >.99                                      | >.99                                               |
| %CD19 transitional of CD19                    | 9                            | 3–15                   | 7                               | 4–8                    | 9                                       | 5–11                   | >.99                                      | >.99                                               |
| CD19 IgD+IgM+ mem (×10 <sup>9</sup> /L)       | 20                           | 18–33                  | 10                              | 10–20                  | 20                                      | 10–30                  | >.99                                      | .21                                                |
| %CD19 IgD+IgM+ mem of CD19                    | 7.9                          | 4.9–11.2               | 5.3                             | 4.4–7.3                | 11.2                                    | 7.3–15.5               | >.99                                      | .76                                                |
| CD19 IgM+ only mem (×10 <sup>9</sup> /L)      | 0                            | 0–0                    | 0                               | 0–0                    | 10                                      | 0–20                   | <.05                                      | >.99                                               |
| %CD19 IgM+ only mem of CD19                   | 1.4                          | 1.0–1.9                | 1.4                             | 0.9–2.2                | 4.1                                     | 2.1–4.9                | .058                                      | >.99                                               |
| CD19 Class Switched mem (×10 <sup>9</sup> /L) | 10                           | 0–20                   | 5                               | 0–10                   | 20                                      | 10–20                  | .55                                       | .74                                                |
| %CD19 Class Switched mem of CD19              | 3.4                          | 2.3–5.1                | 3.9                             | 2.1–5.2                | 7.2                                     | 5.4–10.6               | <.05                                      | >.99                                               |
| %Plasmablasts of CD19                         | 1.6                          | 0.5–1.8                | 0.9                             | 0.6–1.6                | 1.6                                     | 1.1–2.4                | >.99                                      | >.99                                               |
| Plasmablasts (×10 <sup>9</sup> /L)            | 0                            | 0–0                    | 0                               | 0–0                    | 0                                       | 0–0.003                | 0.23                                      | >.99                                               |
| %NK of lymphocytes <sup>b</sup>               | 19                           | 15–30                  | 17                              | 12–20                  | 9                                       | 7–12                   | <.01                                      | .73                                                |
| NK cells (×10 <sup>9</sup> /L) <sup>b</sup>   | 284                          | 210–528                | 213 <sup>a</sup>                | 133–505                | 157                                     | 105–476                | <.05                                      | .82                                                |

P-value using Kruskal-Wallis test followed by Dunn's multiple comparisons test. TREC, T-cell receptor excision circles. Definitions of the cell types and abbreviations are provided in Table E1 in the Online Repository. Counts for activated subsets (act) are reported when quantifiable for more than one individual. <sup>a</sup>Missing data from two 22q11Low, two 22q11Normal individuals and one healthy control. <sup>b</sup>Missing data from one 22q11Low.

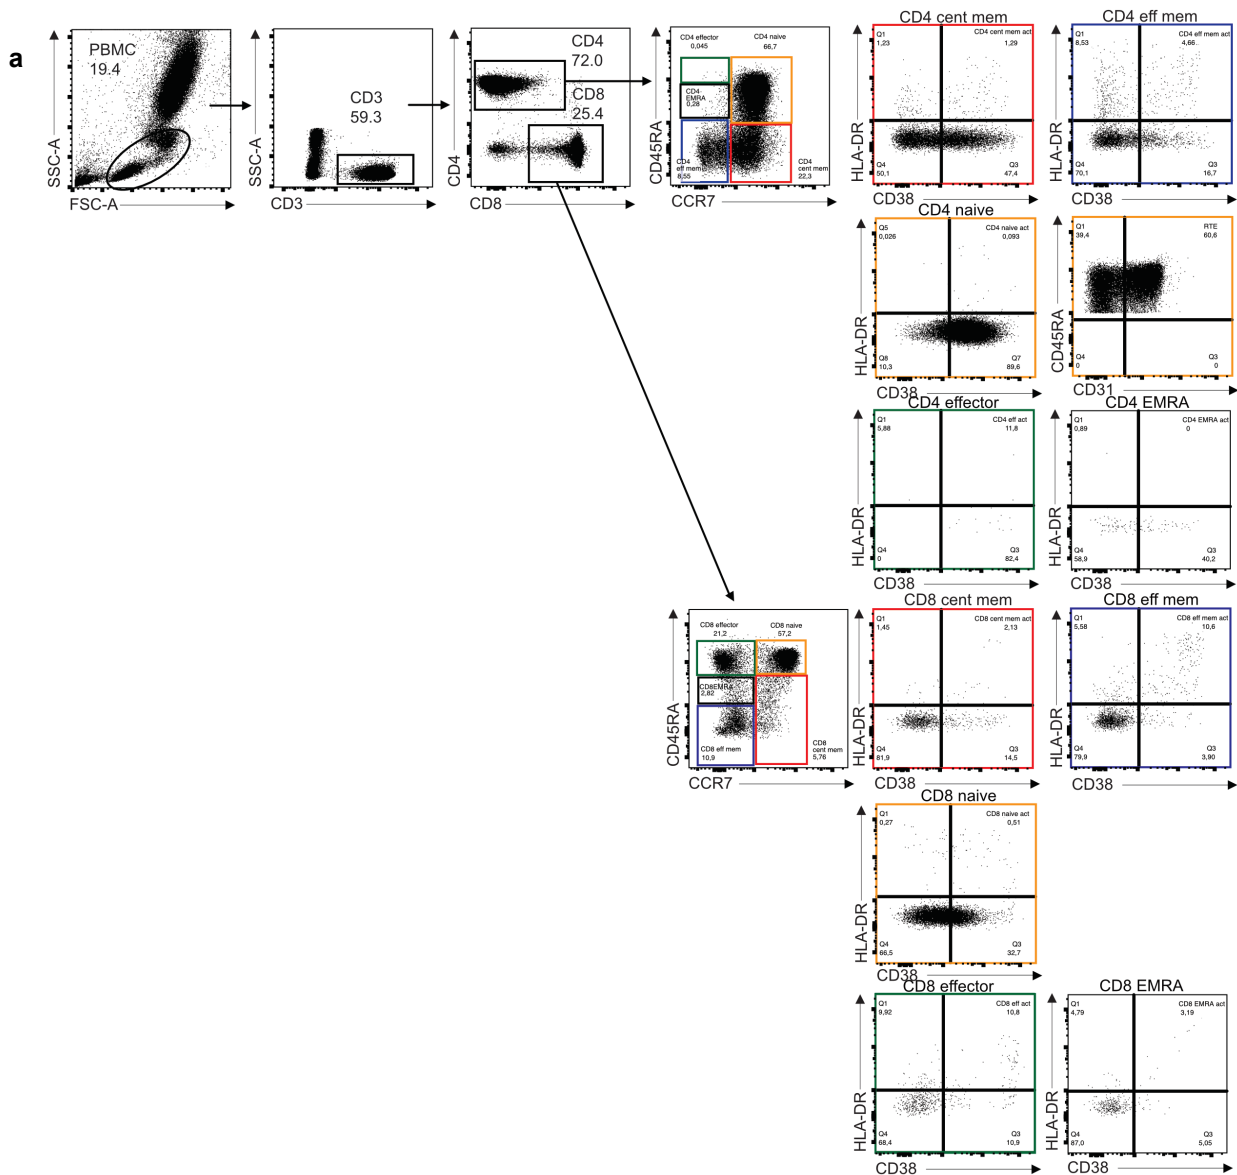

**Fig. S1a** Gating strategy used for flow cytometry, T-lymphocyte subsets

SSC-A, Side-scatter area; FSC-A, forward-scatter area; FSC-H, forward-scatter height.

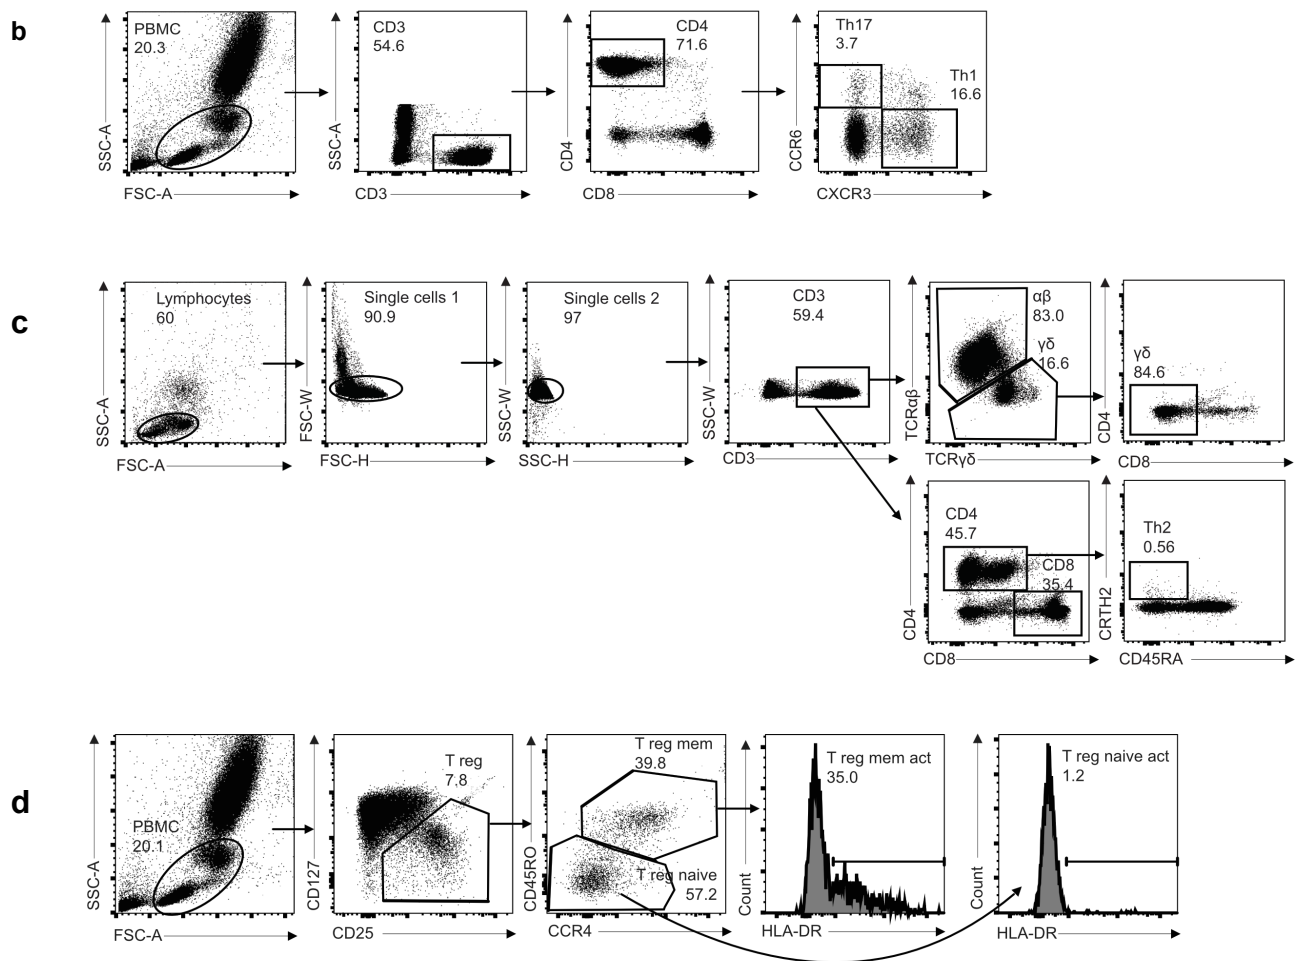

**Fig. S1** Gating strategy used for flow cytometry

**b** T-helper subsets Th1 and Th17

**c** T-helper subset Th2 and  $\gamma\delta$  T lymphocytes

**d** Regulatory T lymphocytes

SSC-A, Side-scatter area; FSC-A, forward-scatter area; FSC-H, forward-scatter height.

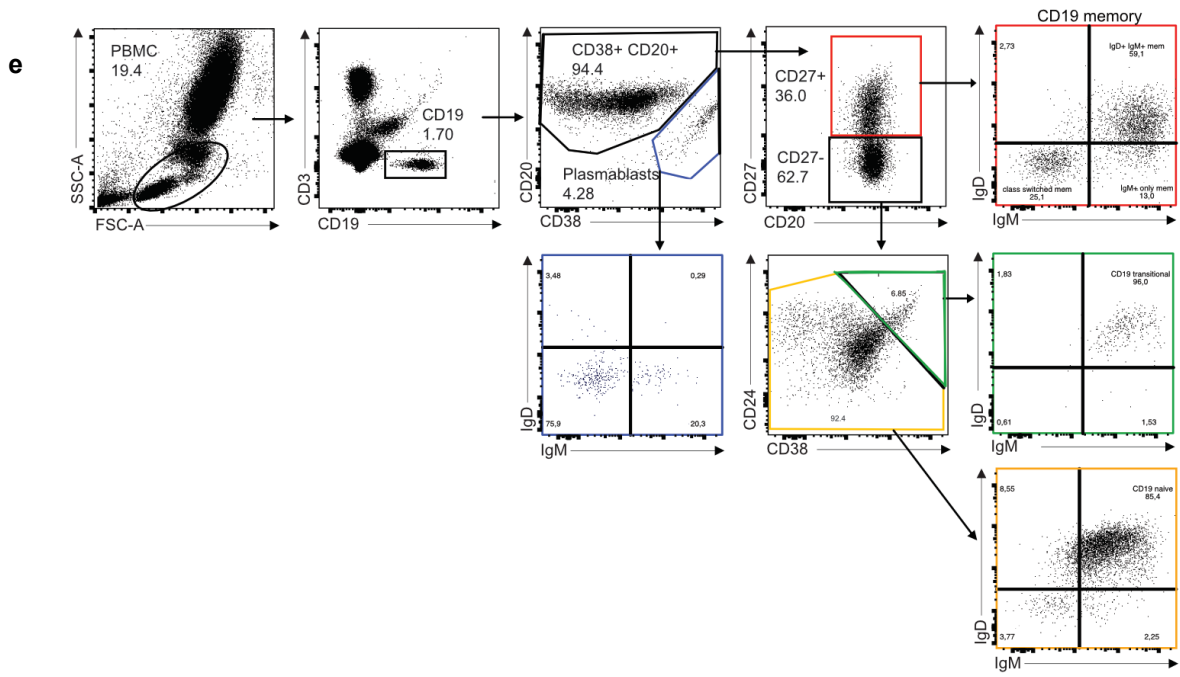

**Fig. S1e** Gating strategy used for flow cytometry, B lymphocytes

SSC-A, Side-scatter area; FSC-A, forward-scatter area; FSC-H, forward-scatter height.

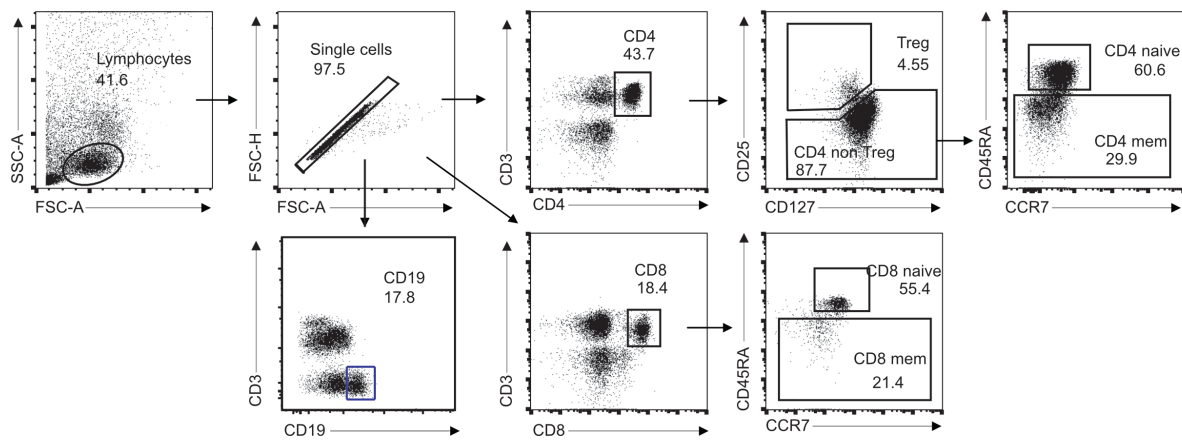

**Fig. S2** Gating strategy for the cell sorting

B lymphocytes, naïve and memory T helper lymphocytes, and naïve and memory cytotoxic T lymphocytes were sorted.

SSC-A, Side scatter area; FSC-A, forward scatter area; FSC-H, forward scatter height.

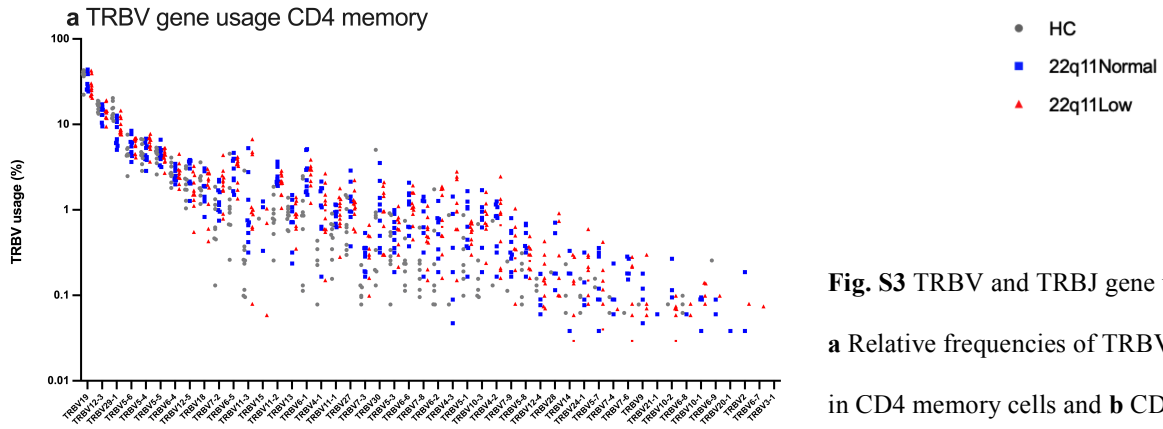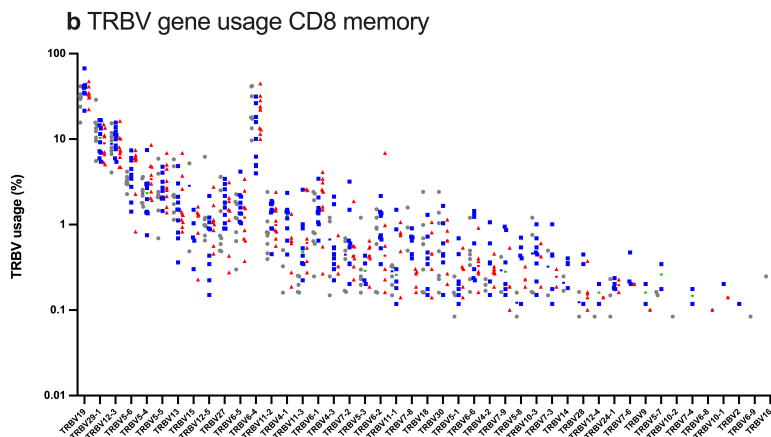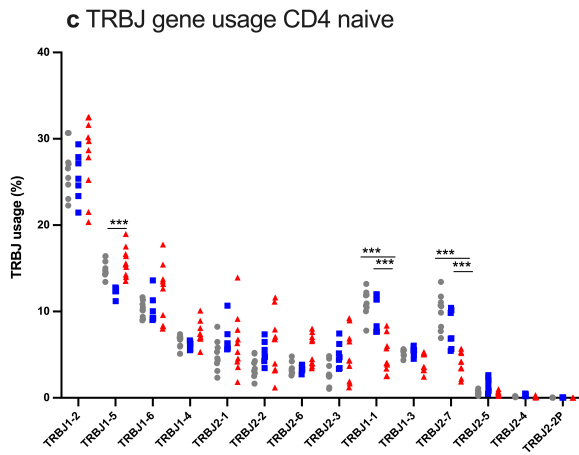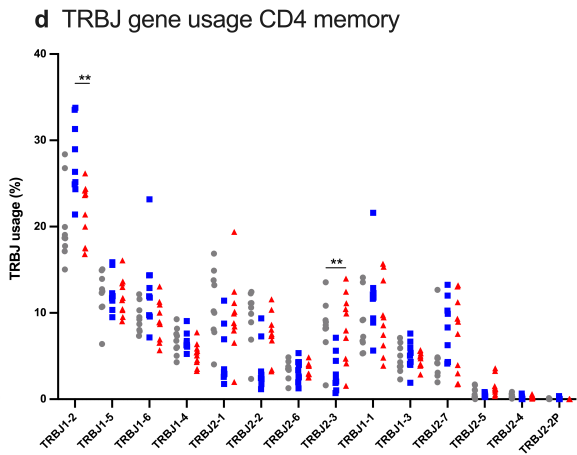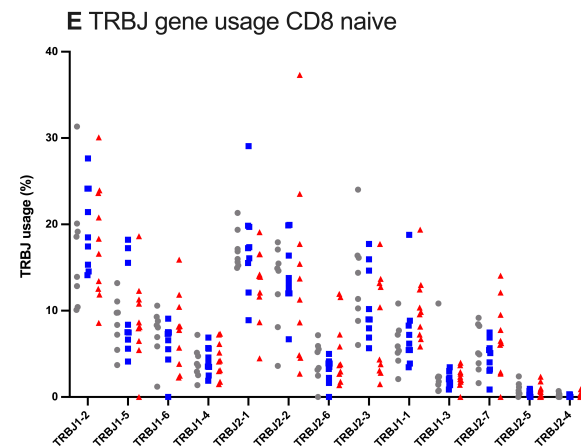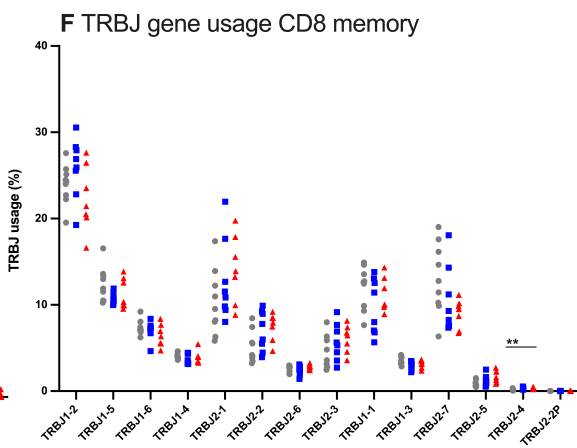

**Fig. S3 TRBV and TRBJ gene usage**

**a** Relative frequencies of TRBV gene usage

in CD4 memory cells and **b** CD8 memory

cells. **c** TRBJ gene usage in CD4 naïve,

**d** CD4 memory, **e** CD8 naïve and **f** CD8

memory cells. Definitions of the cell types

are provided in Supplementary Table S1.

Results are shown as individual values for the

healthy controls (gray dots), 22q11Normal

patients (blue squares), and 22q11Low



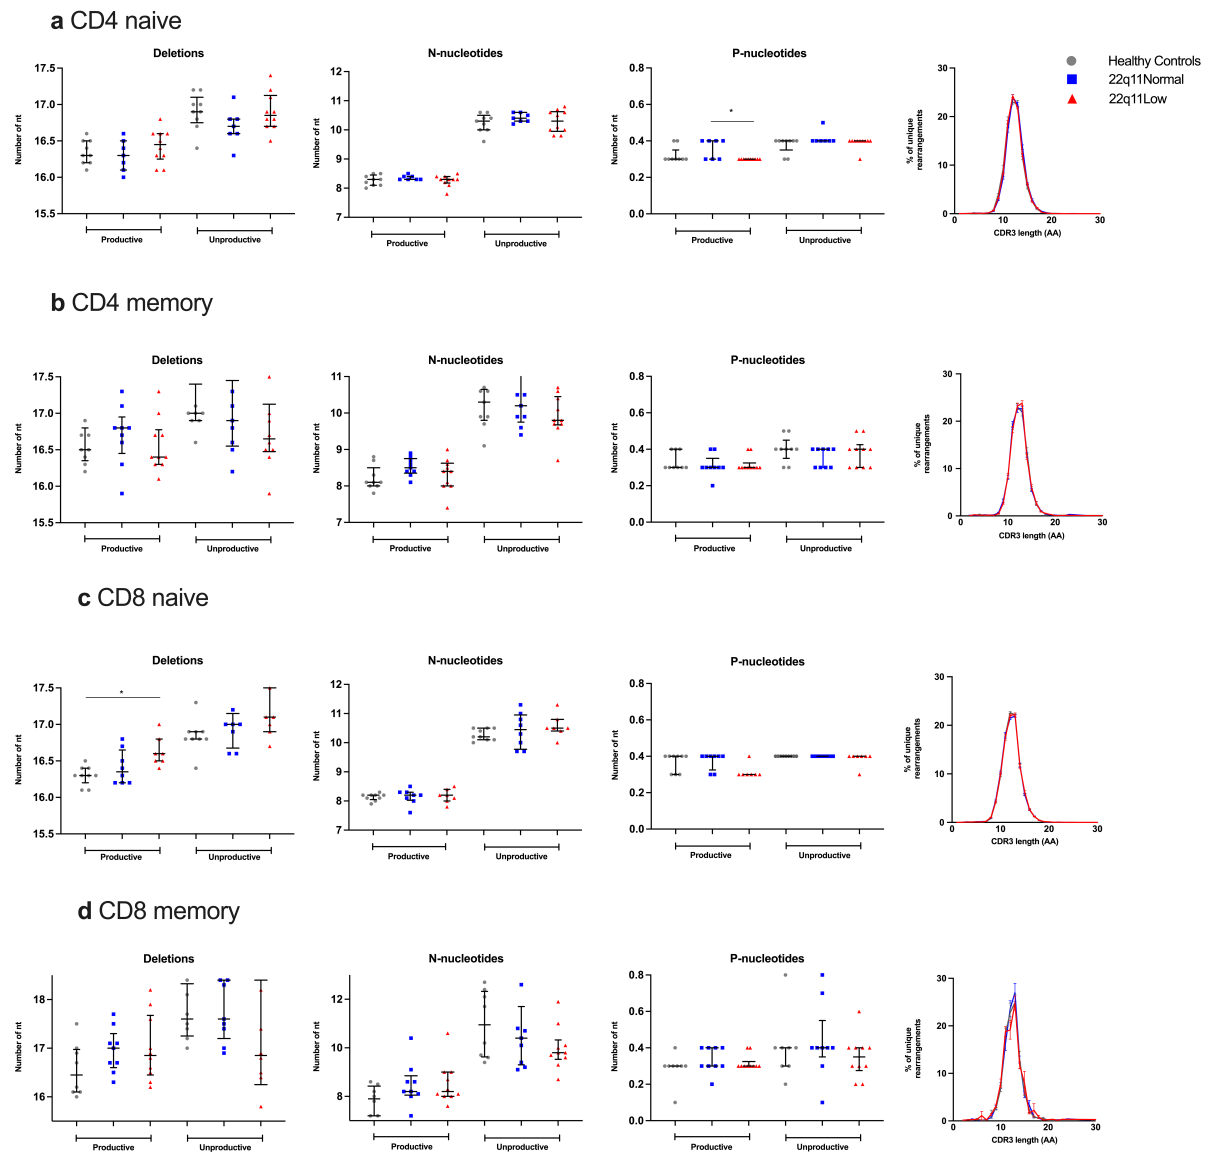

**Fig. S4** TRB junction characteristics of the T-lymphocyte populations

**a** Junctional deletions and insertions of N- and P-nucleotides and CDR3 length distribution in the CD4 naïve, **b** CD4 memory, **c** CD8 naïve and **d** CD8 memory cells. Definitions of the cell types are provided in Supplementary Table S1.

Results are shown as individual values for the healthy controls (gray dots), 22q11Normal individuals (blue squares), and 22q11Low individuals (red triangles). Information on missing data is provided in Supplementary Table S3. Lines denote medians and whiskers indicate the interquartile ranges. Results in the CDR3 length distribution plots are presented as group mean values with the whiskers representing SEM. *P*-value summary indicated on each graph: \* $P \leq .05$ .
